# Supplementary material for: Improved mesostructured oxygen electrodes for highly performing solid oxide cells for co-electrolysis of steam and carbon dioxide
Source: Royal Society of Chemistry journal article supplement (doi:10.1039/c9ta07373f), 2019-01-01
Supplement: c9ta07373f1.pdf [file c9ta07373f1.pdf]

# Improved mesostructured oxygen electrodes for highly performing solid oxide cells for co-electrolysis of steam and carbon dioxide

S. Anelli,<sup>a</sup> F. Baiutti,<sup>a</sup> A. Hornés,<sup>a</sup> L. Bernadet,<sup>a</sup> M. Torrell,<sup>a</sup> A. Tarancón<sup>a,b</sup>

<sup>a</sup>Catalonia Institute for Energy Research (IREC), Department of Advanced Materials for Energy, Jardins de les Dones de Negre, 1, 08930 Sant Adrià de Besòs, Barcelona, Spain. E-mail: mtorrell@irec.cat

<sup>b</sup>ICREA, Passeig Lluís Companys 23, 08010 Barcelona, Spain

## SUPPLEMENTARY INFORMATION

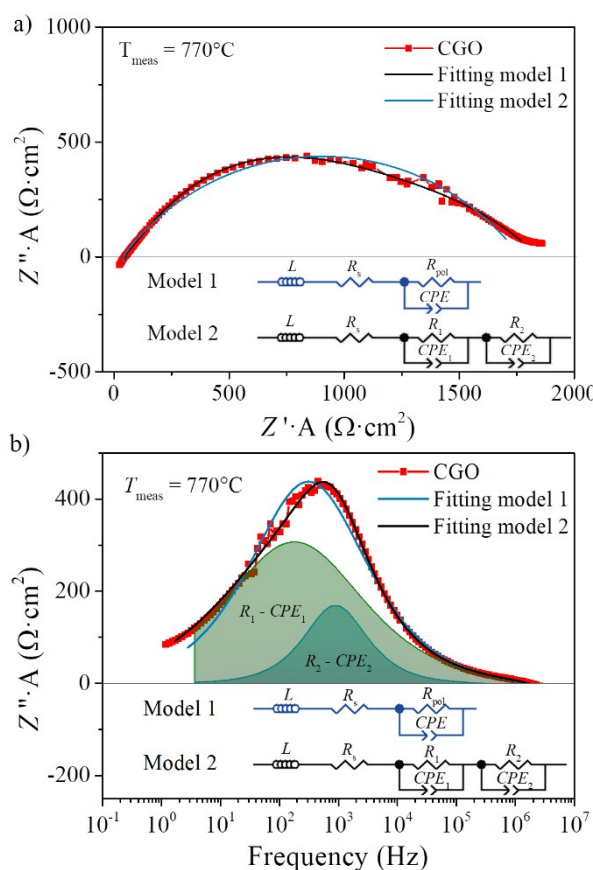

**Figure S1.** S1a) Nyquist plot ( $T=770^{\circ}\text{C}$ ) of a YSZ/mesoporous CGO test cell is shown with the equivalent circuits used for the fitting. S1b) Bode plot with the two different fitting models. The single  $R_i - CPE_i$  are highlighted.

Impedance spectroscopy measurements were carried out on YSZ/mesoporous CGO test cells. Figure S1a shows a representative Nyquist plot at 700 °C. Two different equivalent circuits were taken into account to fit the spectrum: the *model 1* composed by an  $R_pQ$  element in series with an inductance ( $L$ ) and a serial resistance ( $R_s$ ) and the *model 2* with two  $R_pQ$  in series. The bode plot of panel S1b, highlights the inaccuracy of the fitting obtained by model 1, while the asymmetry of the arc is perfectly fitted by circuit model 2.

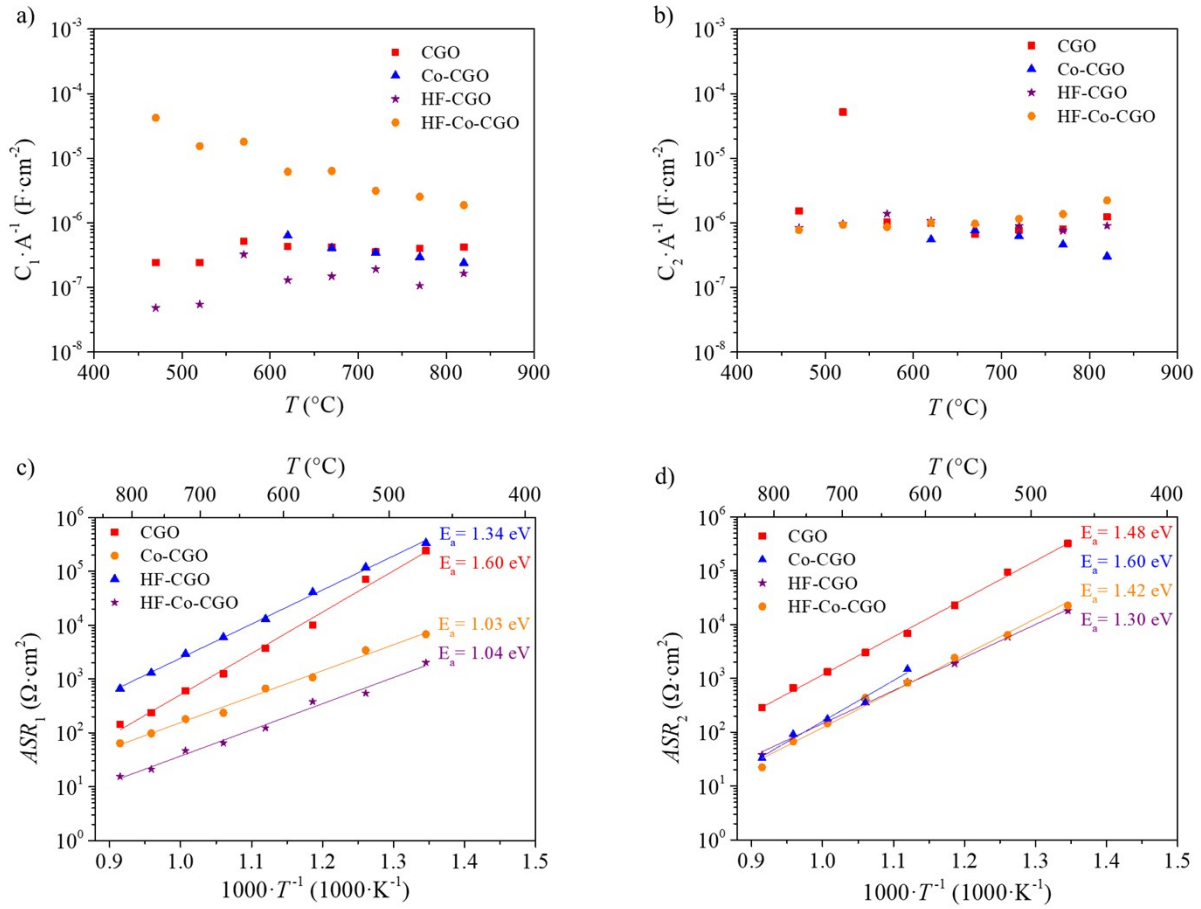

**Figure S2.** Resulting EIS fitting parameters for symmetric CGO/YSZ cells as a function of temperature. The high (low) frequency arc true capacitance and area specific resistance are reported in panels a (b) and c (d), respectively.

The results of the fittings of the impedance arcs related to symmetric mesoporous CGO/YSZ cells are reported in Figure S2 (the fitting model is “model 2” in Figure S1). The two contributions are characterized by similar activation energies (1-1.5 eV) and capacitances ( $10^{-7}$ - $10^{-6}$  F·cm<sup>2</sup>) and should

therefore be attributed to very similar phenomena arguably related to solid-gas reactions, i.e. the Au/ceria/gas TPB reaction and the oxygen exchange at the ceria surface.<sup>1</sup> Alternatively, one can imagine that a slight difference in the microstructural parameters (i.e thickness and density) of the two electrodes may lead to a different in the characteristic time response for each electrode.

### **Supplementary references**

- 1 A. Flura A., C. Nicollet, S. Forucade, V. Vibhu, A. Rougier, J-M Bassat, J-C. Grenier, *Electrochem. Acta* 2015, 174, 1030-1040
